# Supplementary material for: Fabrication of a porous NiFeP/Ni electrode for highly efficient hydrazine oxidation boosted H2 evolution
Source: Royal Society of Chemistry journal article supplement (doi:10.1039/d1na00043h), 2021-01-01
Supplement: d1na00043h1.pdf [file d1na00043h1.pdf]

Electronic Supplementary Material (ESI) for Nanoscale Advances. This journal is ©

The Royal Society of Chemistry 2021

## **Supporting Information**

**Dual-regulating Strategy Fabrication of Porous NiFeP/Ni Electrode for Highly**

**Efficient Hydrazine Oxidation Boost H<sub>2</sub> Evolution**

Honglei Wang, Shengyang Tao\*

Department of Chemistry, School of Chemical Engineering, Dalian University of  
Technology, Dalian 116024, China.

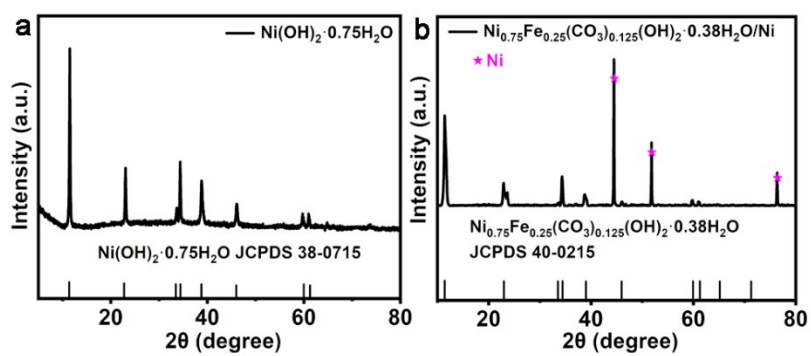

**Fig. S1** (a) The XRD patterns of  $\text{Ni(OH)}_2 \cdot 0.75\text{H}_2\text{O}$  and (b) Pre-NiFe/Ni.

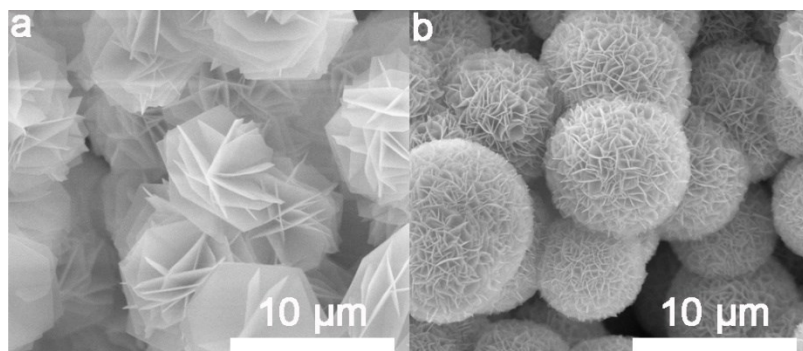

**Fig. S2** (a) The SEM images of  $\text{Ni(OH)}_2 \cdot 0.75\text{H}_2\text{O}/\text{Ni}$  and (b) Pre-NiFe/Ni.

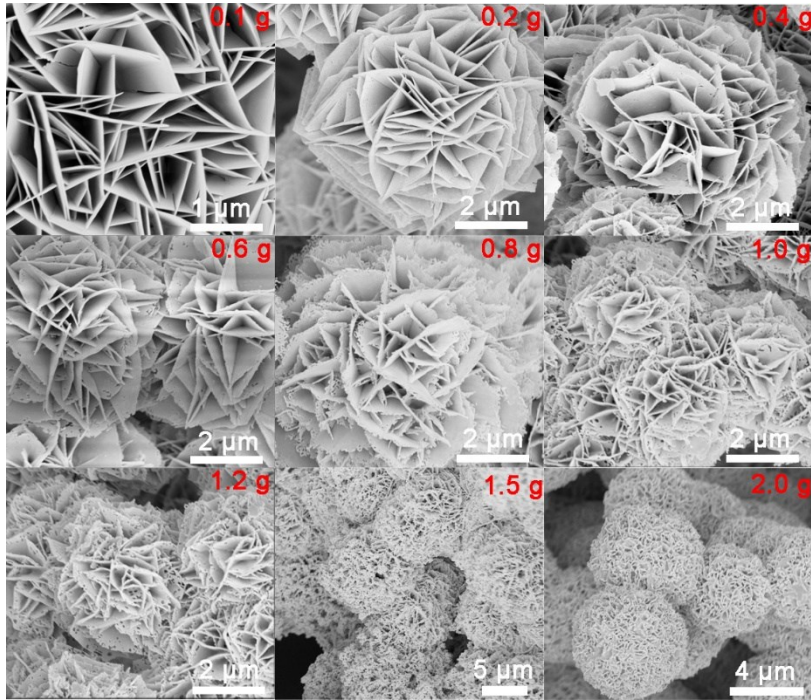

**Fig. S3** The SEM images of P-NiFeP/Ni under the different phosphorus sources content.

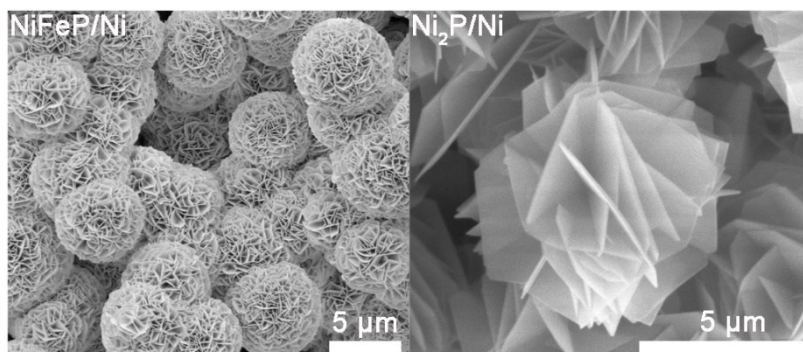

**Fig. S4** The SEM images of NiFeP/Ni and Ni<sub>2</sub>P/Ni under the same phosphating conditions as P-NiFeP/Ni.

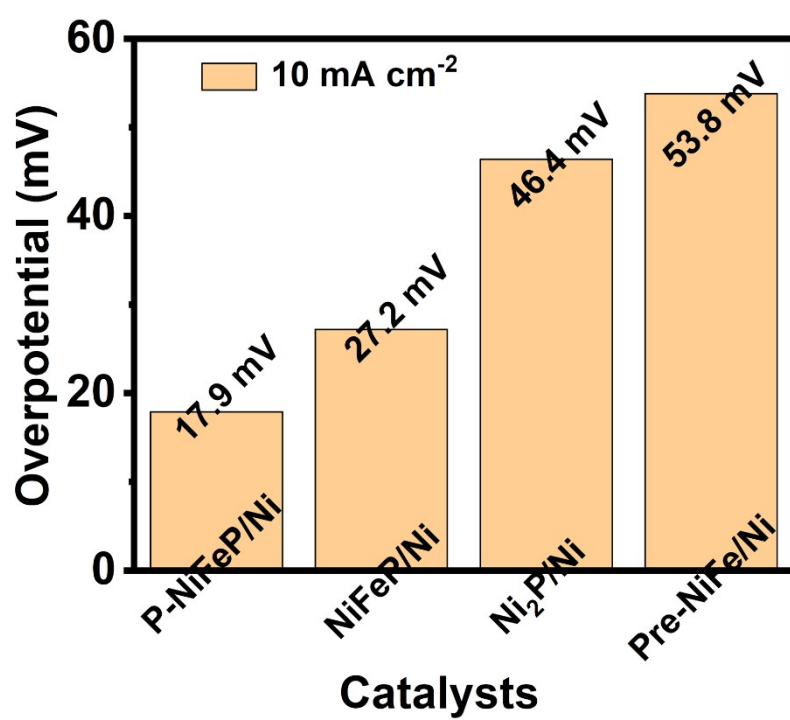

Fig. S5 The overpotential of the catalysts at 10 mA cm<sup>-2</sup>.

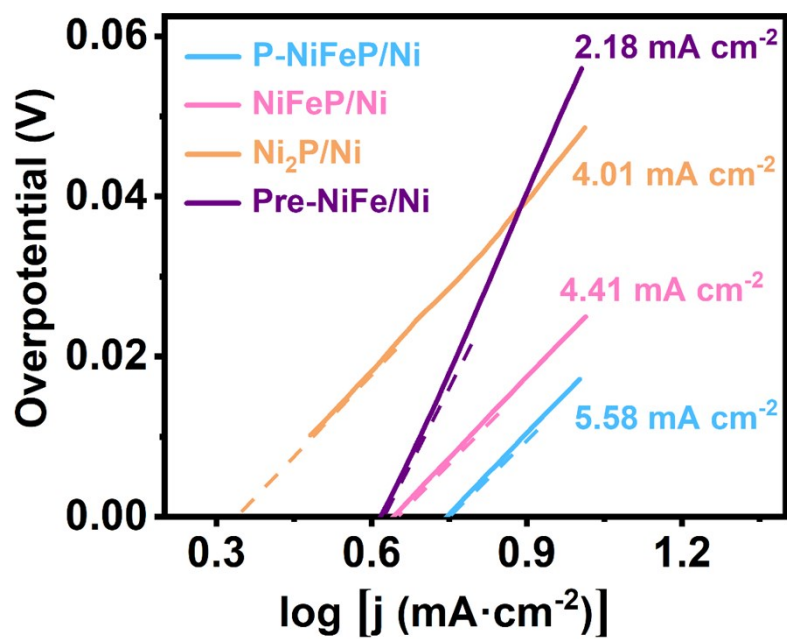

Fig. S6 The exchange current density of the as-prepared catalysts.

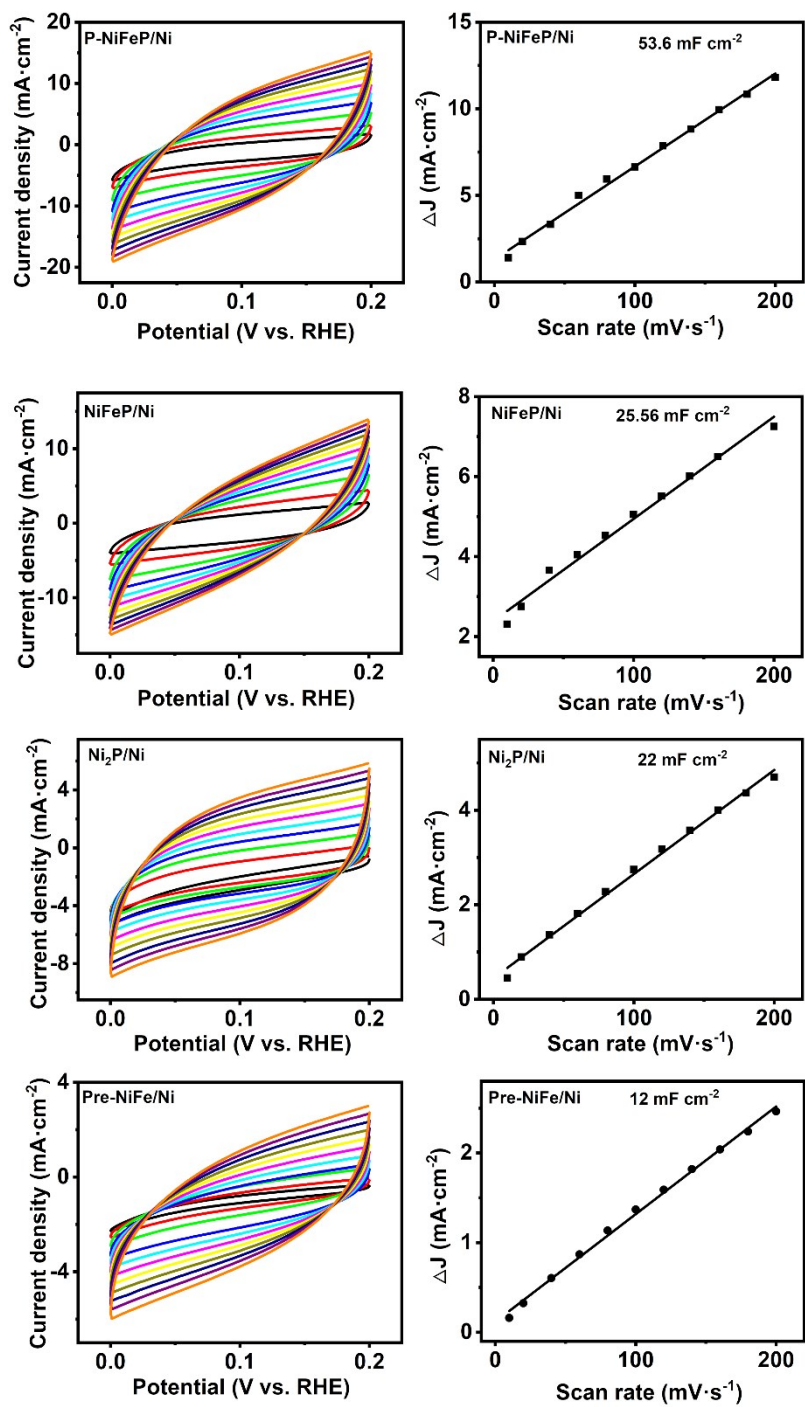

**Fig. S7** The CV curves for catalysts with scanning rates from 10 to 200 mV s<sup>-1</sup> and the capacitive current densities as a function of scan rate for catalysts.

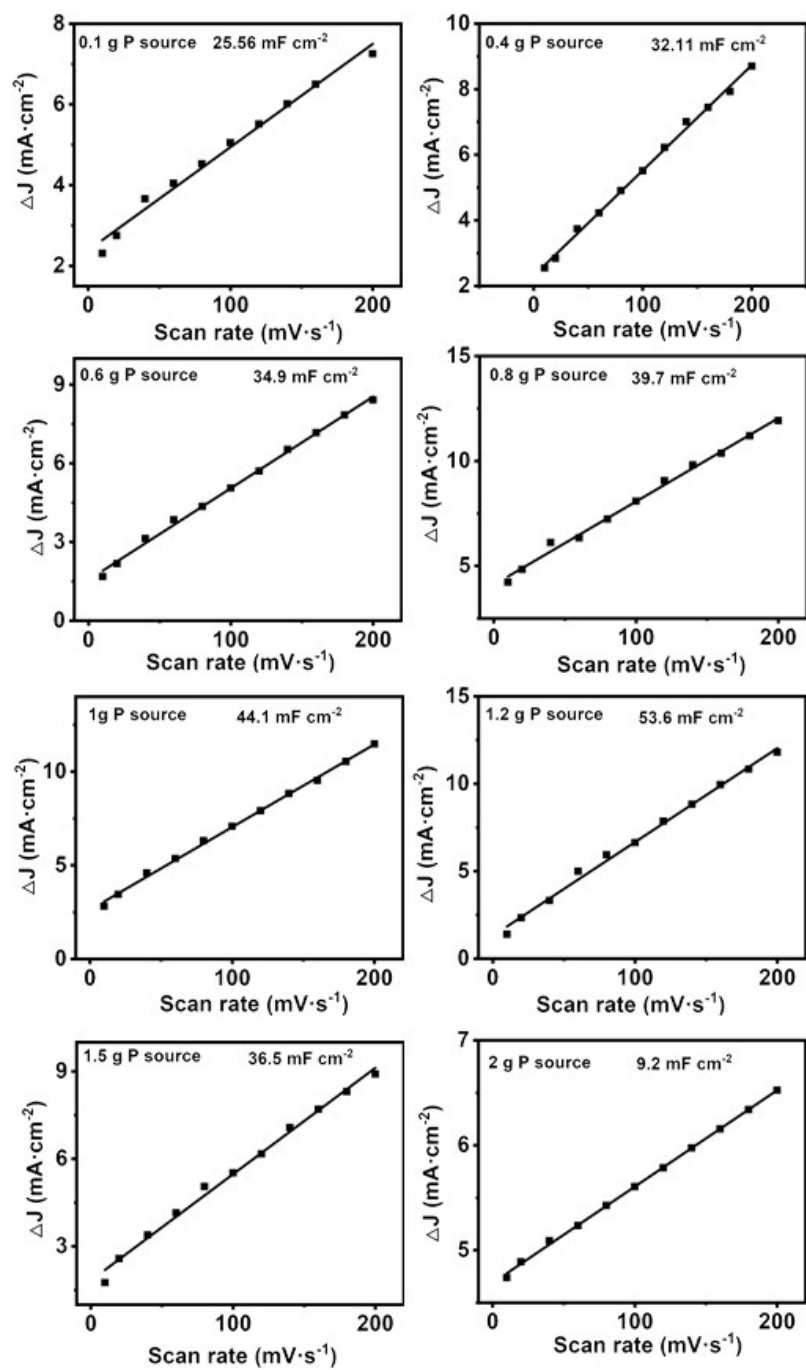

**Fig. S8** The capacitive current densities as a function of scan rate for P-NiFeP/Ni with different phosphorus sources.

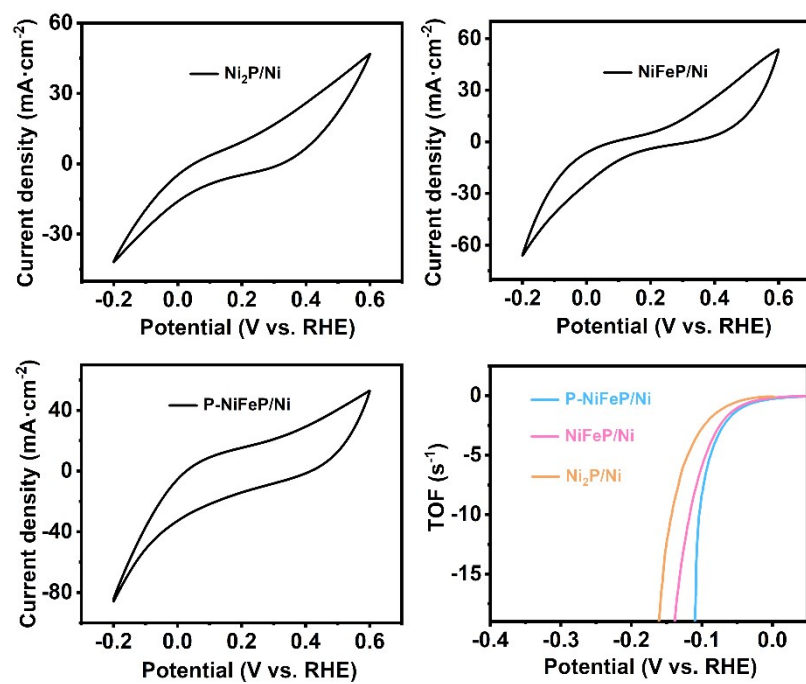

**Fig. S9** The CVs with a scan rate of  $100 \text{ mV s}^{-1}$  at  $\text{pH}=7$  and turnover frequency for as-synthesized samples.



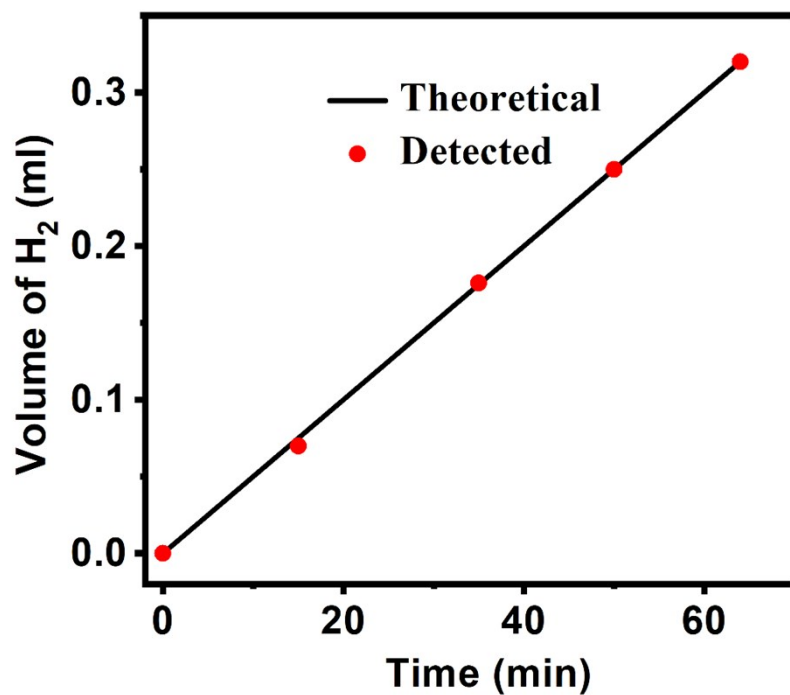

**Fig. S10** The amount of H<sub>2</sub> theoretically calculated and experimentally measured versus time for P-NiFeP/Ni at pH = 14 at an overpotential of 300 mV for 80 min.

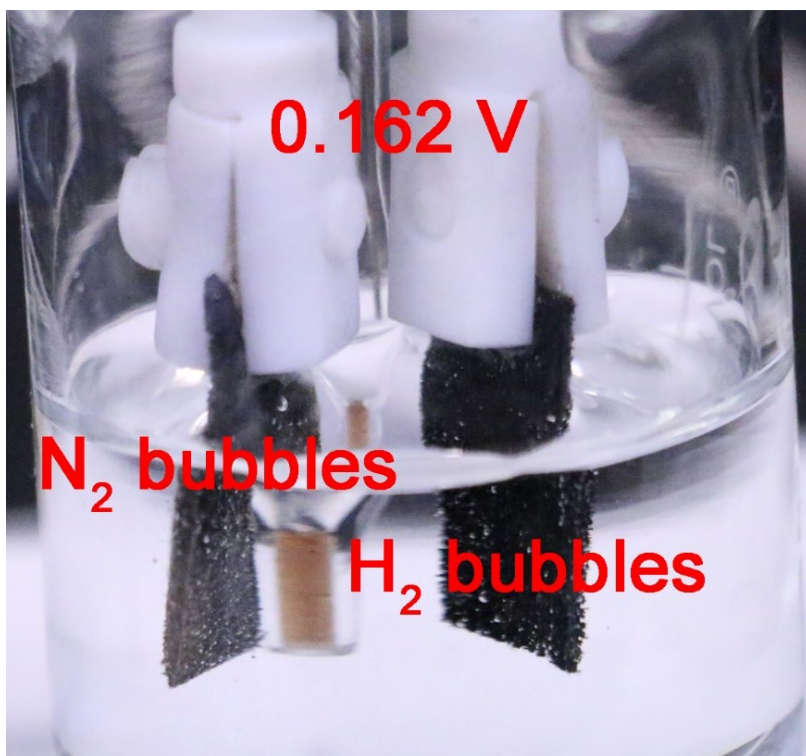

**Fig. S11** The photo of the P-NiFeP/Ni electrode couple system for overall hydrazine splitting at  $0.162\text{ V}$  voltage.

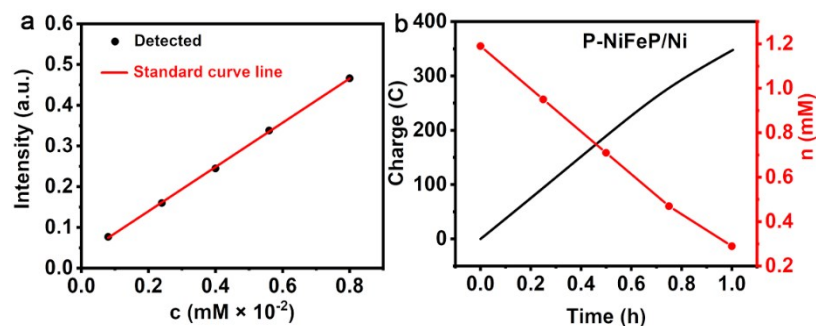

**Fig. S12** (a) Calibration curve of reaction products of hydrazine with p-dimethylaminobenzaldehyde. (b) Hydrazine concentration–time and charge–time curve during constant potential ( $0.28\text{ V}$  vs. RHE) electrolysis.

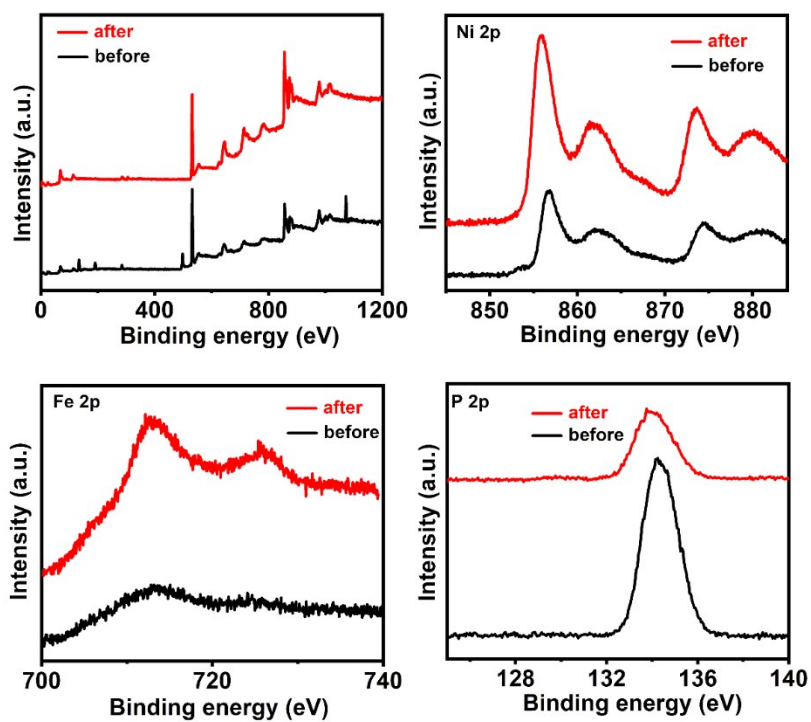

**Fig. S13** The comparison of the XPS spectra of P-NiFeP/Ni before and after hydrazine oxidation.

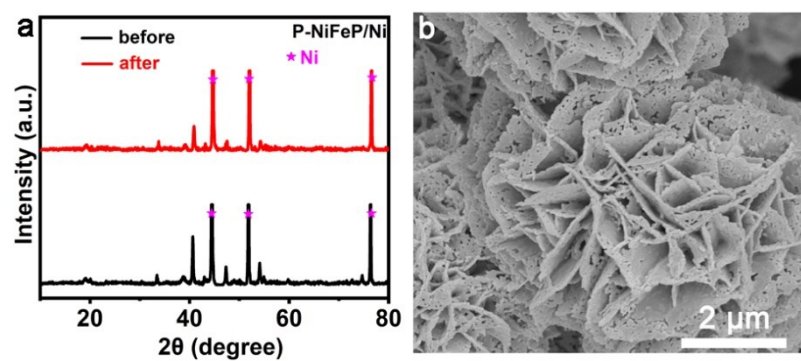

Fig. S14 The XRD pattern and SEM image of P-NiFeP/Ni after H<sub>2</sub>OR.

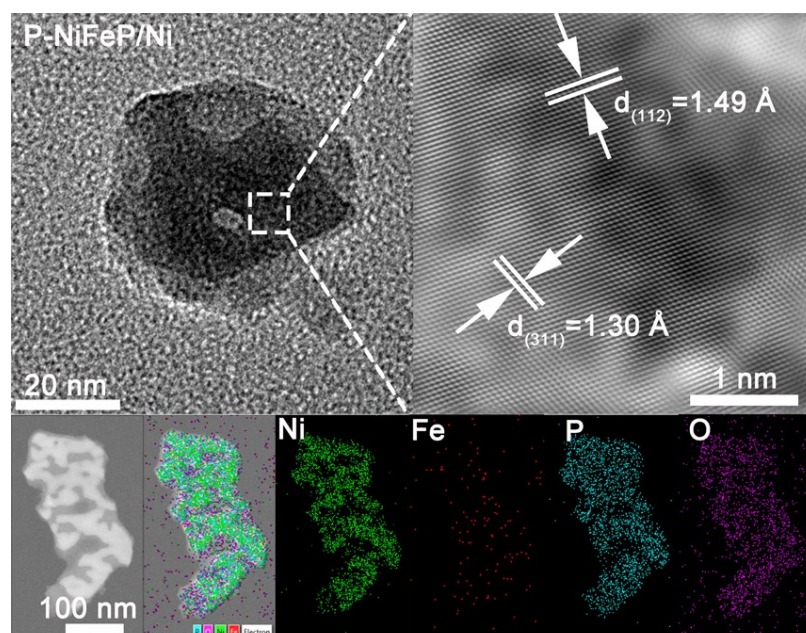

Fig. S15 The TEM image and corresponding the elements mapping of P-NiFeP/Ni after H<sub>2</sub>OR.

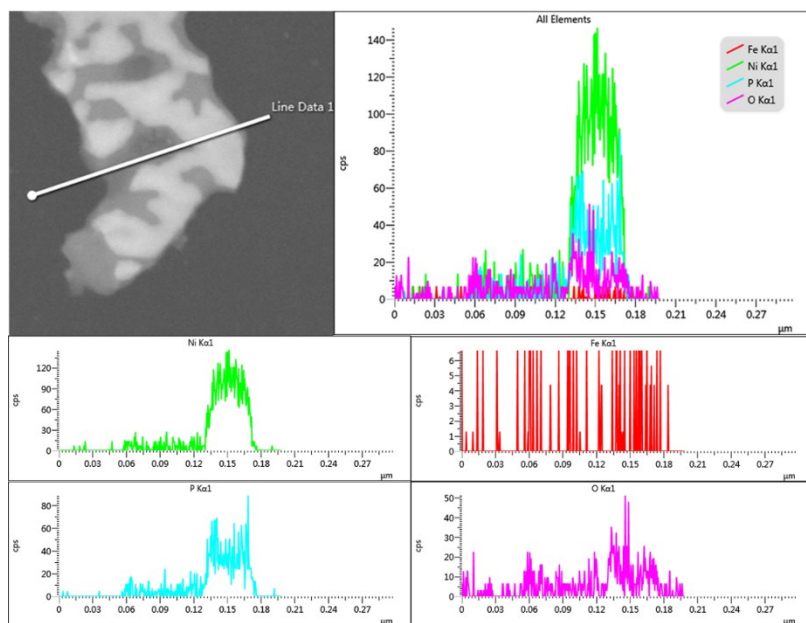

**Fig. S16** The compositional line profiles of Ni (green), Fe (red), P (cyan), and O (pink) were recorded along the arrow of the sample after testing.

**Table S1.** The content of each element in P-NiFeP/Ni determined by XPS.

| Element | Atomic (%) |
|---------|------------|
| C       | 9.65       |
| O       | 58.26      |
| Fe      | 4.87       |
| Ni      | 12.8       |

|   |       |
|---|-------|
| P | 14.42 |
|---|-------|

**Table S2.** The content of each element in P-NiFeP/Ni determined by EDS.

| Element | Weight (%) | Atomic (%) |
|---------|------------|------------|
| C       | 3.54       | 11.07      |
| O       | 13.31      | 31.26      |
| P       | 10.46      | 12.69      |
| Fe      | 5.18       | 3.49       |
| Ni      | 63.70      | 40.77      |
| Pt      | 3.82       | 0.74       |

**Table S3.** Comparison of the HER performance of this work with the reported catalysts in 1.0 M KOH.

| Materials                   | $\eta_{10}$ (mV) | Tafle slope (mV dec <sup>-1</sup> ) | Reference        |
|-----------------------------|------------------|-------------------------------------|------------------|
| <b>P-NiFeP/Ni</b>           | <b>17.9</b>      | <b>63</b>                           | <b>This work</b> |
| PW-CO <sub>3</sub> N NWA/NF | 41               | 40                                  | 1                |
| Ni <sub>3</sub> N/C         | 64               | 48                                  | 2                |

|                       |     |      |   |
|-----------------------|-----|------|---|
| N-CoP <sub>2</sub>    | 38  | 46   | 3 |
| Co <sub>2</sub> N/Co  | 12  | 41.6 | 4 |
| Co <sub>4</sub> N     | 37  | 44   | 5 |
| Co-Ni <sub>3</sub> N  | 194 | 156  | 6 |
| NiP <sub>2</sub> -650 | 134 | 67   | 7 |
| TM-ReSe <sub>2</sub>  | 109 | 81   | 8 |
| SGNC-900              | 32  | 39   | 9 |

**Table S4.** Comparison of the H<sub>2</sub>OR performance of this work with recently reported catalysts in 1.0 M KOH.

| Catalysts                                 | Current density (mA) | Overpotential (mV) | Reference |
|-------------------------------------------|----------------------|--------------------|-----------|
| P-NiFeP/Ni                                | 10                   | 77                 | This work |
|                                           | 100                  | 153                |           |
|                                           | 300                  | 269                |           |
| CoSe <sub>2</sub>                         | 10                   | 164                | 10        |
| Cu <sub>1</sub> Ni <sub>2</sub> -N        | 50                   | 96.9               | 11        |
| Ni <sub>x</sub> P/NF                      | 172                  | 100                | 12        |
| Ni <sub>3</sub> S <sub>2</sub> /NF        | 100                  | 415                | 13        |
| NiZn                                      | 320                  | 600                | 14        |
| NiCoSe <sub>2</sub> /NF                   | 40                   | 600                | 15        |
| Ni <sub>3</sub> Se <sub>4</sub> /NF       | 75                   | 400                | 16        |
| NiFeP/NM                                  | 200                  | 300                | 17        |
| Ni <sub>0.6</sub> Co <sub>0.4</sub> Se/NF | 300                  | 400                | 18        |

## Notes and references

- 1 Y. Liu, J. Zhang, Y. Li, Q. Qian, Z. Li, Y. Zhu and G. Zhang, *Nat. Commun.*, 2020, **11**, 1853.

- 2 W. Ni, A. Krammer, C. S. Hsu, H. M. Chen, A. Schuler and X. Hu, *Angew. Chem., Int. Ed.*, 2019, **58**, 7445-7449.
- 3 J. Y. Cai, Y. Song, Y. P. Zang, S. W. Niu, Y. S. Wu, Y. F. Xie, X. S. Zheng, Y. Liu, Y. Lin, X. J. Liu, G. M. Wang and Y. T. Qian, *Sci. Adv.*, 2020, **6**, eaaw8113.
- 4 F. Song, W. Li, J. Yang, G. Han, T. Yan, X. Liu, Y. Rao, P. Liao, Z. Cao and Y. Sun, *ACS Energy Lett.*, 2019, **4**, 1594-1601.
- 5 Z. Chen, Y. Song, J. Cai, X. Zheng, D. Han, Y. Wu, Y. Zang, S. Niu, Y. Liu, J. Zhu, X. Liu and G. Wang, *Angew. Chem., Int. Ed.*, 2018, **57**, 5076-5080.
- 6 C. Zhu, A. L. Wang, W. Xiao, D. Chao, X. Zhang, N. H. Tiep, S. Chen, J. Kang, X. Wang, J. Ding, J. Wang, H. Zhang and H. J. Fan, *Adv. Mater.*, 2018, **30**, 1705516.
- 7 Q. Fu, X. Wang, J. Han, J. Zhong, Z. Tongrui, T. Yao, C. Xu, T. Gao, S. Xi, C. Liang, L. Xu, P. Xu and B. Song, *Angew. Chem., Int. Ed.*, 2020, **59**, 2-10.
- 8 I. S. Kwon, I. H. Kwak, S. Ju, S. Kang, S. Han, Y. C. Park, J. Park and J. Park, *ACS Nano*, 2020, **14**, 12184-12194.
- 9 R. Wei, Y. Gu, L. Zou, B. Xi, Y. Zhao, Y. Ma, Y. Qian, S. Xiong and Q. Xu, *Nano Lett.*, 2020, **20**, 7342-7349.
- 10 J. Y. Zhang, H. Wang, Y. Tian, Y. Yan, Q. Xue, T. He, H. Liu, C. Wang, Y. Chen and B. Y. Xia, *Angew. Chem., Int. Ed.*, 2018, **57**, 7649-7653.
- 11 Z. Wang, L. Xu, F. Huang, L. Qu, J. Li, K. A. Owusu, Z. Liu, Z. Lin, B. Xiang, X. Liu, K. Zhao, X. Liao, W. Yang, Y. B. Cheng and L. Mai, *Adv. Energy Mater.*, 2019, **9**, 1900390.
- 12 H. Wen, L. Y. Gan, H.-B. Dai, X. P. Wen, L. S. Wu, H. Wu and P. Wang, *Appl. Catal., B*, 2019, **241**, 292-298.



- 13 G. Liu, Z. Sun, X. Zhang, H. Wang, G. Wang, X. Wu, H. Zhang and H. Zhao, *J. Mater. Chem. A*, 2018, **6**, 19201-19209.
- 14 A. Serov, M. Padilla, A. J. Roy, P. Atanassov, T. Sakamoto, K. Asazawa and H. Tanaka, *Angew. Chem., Int. Ed.*, 2014, **53**, 10336-10339.
- 15 K. Akbar, J. H. Jeon, M. Kim, J. Jeong, Y. Yi and S. H. Chun, *ACS Sustain. Chem. Eng.*, 2018, **6**, 7735-7742.
- 16 J. Y. Zhang, X. Tian, T. He, S. Zaman, M. Miao, Y. Yan, K. Qi, Z. Dong, H. Liu and B. Y. Xia, *J. Mater. Chem. A*, 2018, **6**, 15653-15658.
- 17 Q. Sun, M. Zhou, Y. Shen, L. Wang, Y. Ma, Y. Li, X. Bo, Z. Wang and C. Zhao, *J. Catal.*, 2019, **373**, 180-189.
- 18 Z. Feng, E. Wang, S. Huang and J. Liu, *Nanoscale*, 2020, **12**, 4426-4434.
